# Supplementary material for: Impact of Multimorbidity on Quality of Life: The Mediation Role of Intrinsic Capacity – Evidence from the WHO ICOPE Pilot Program in Lianyungang of China
Source: Research Square preprint supplement (doi:10.21203/rs.3.rs-7086226/v1), 2025-08-21
Supplement: Supplementary file 1 [file 614f33396de74a5bd9a7ca8f.docx]

**Appendix 1**

**Supplementary Table 1. Correlations of the main study variables**

| Variables | Multimorbidity | IC | EQ-5D-3L level |
| --- | --- | --- | --- |
| Multimorbidity | 1 |  |  |
| IC | -0.222*** | 1 |  |
| EQ-5D-3L level | 0.225*** | -0.246*** | 1 |
| IC, intrinsic capacity; ****p* < 0.001. | | | |

**Appendix 2**

**
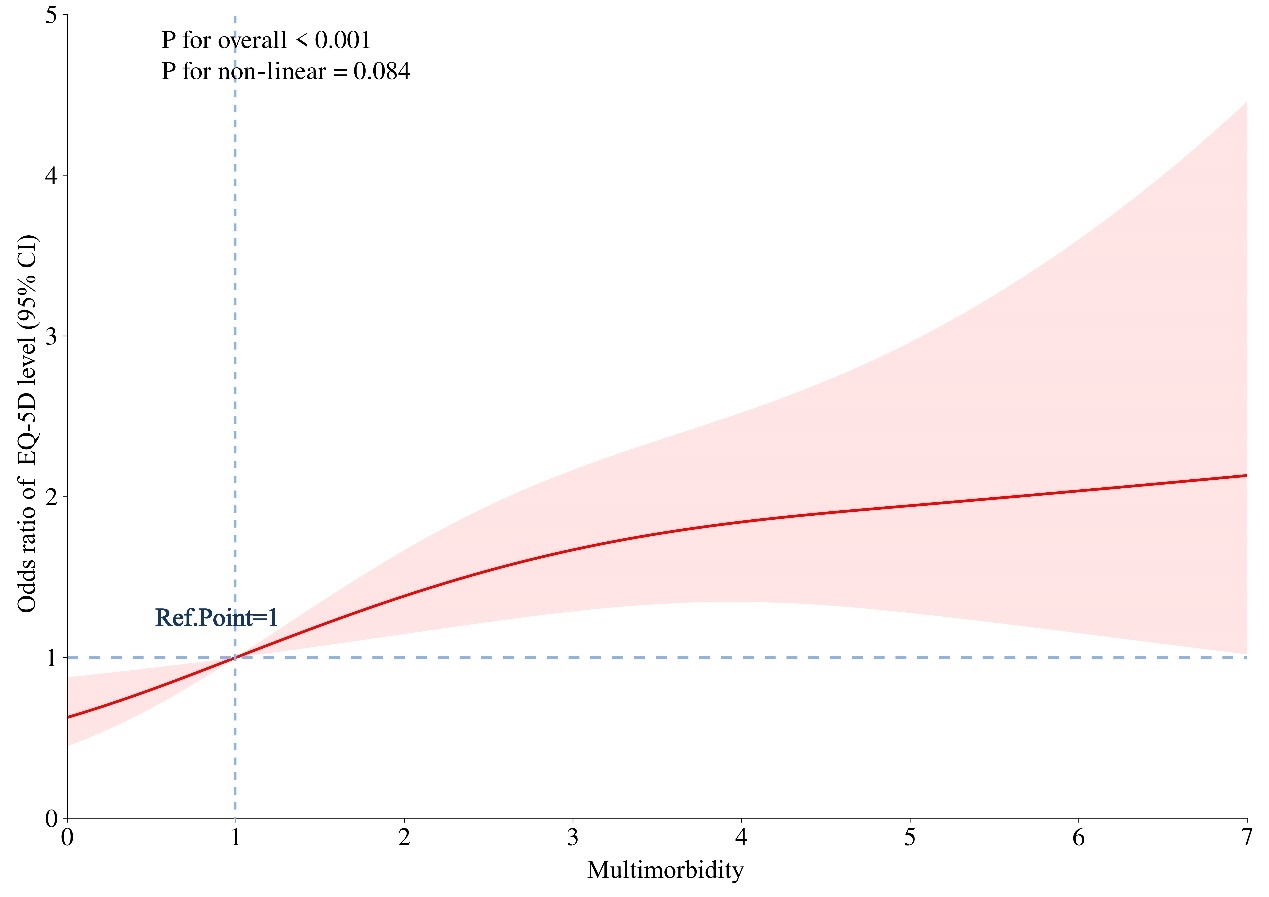
**

**Supplementary Figure 1. Weighted restricted cubic spline curve describing the relationship between CCI score and Low QoL.**

**Adjusted for all covariates gender, age, marital status, education, nursing home resident status, IC.**

**Ref. Point, Reference. Point; CI, confidence interval.**
